# Supplementary material for: Structure-guided disruption of the pseudopilus tip complex inhibits the Type II secretion in Pseudomonas aeruginosa
Source: PubMed Central journal article supplement (PMC6211770; doi:10.1371/journal.ppat.1007343), 2018-10-22
Supplement: ppat.1007343.s001.pdf [file ppat.1007343.s001.pdf]

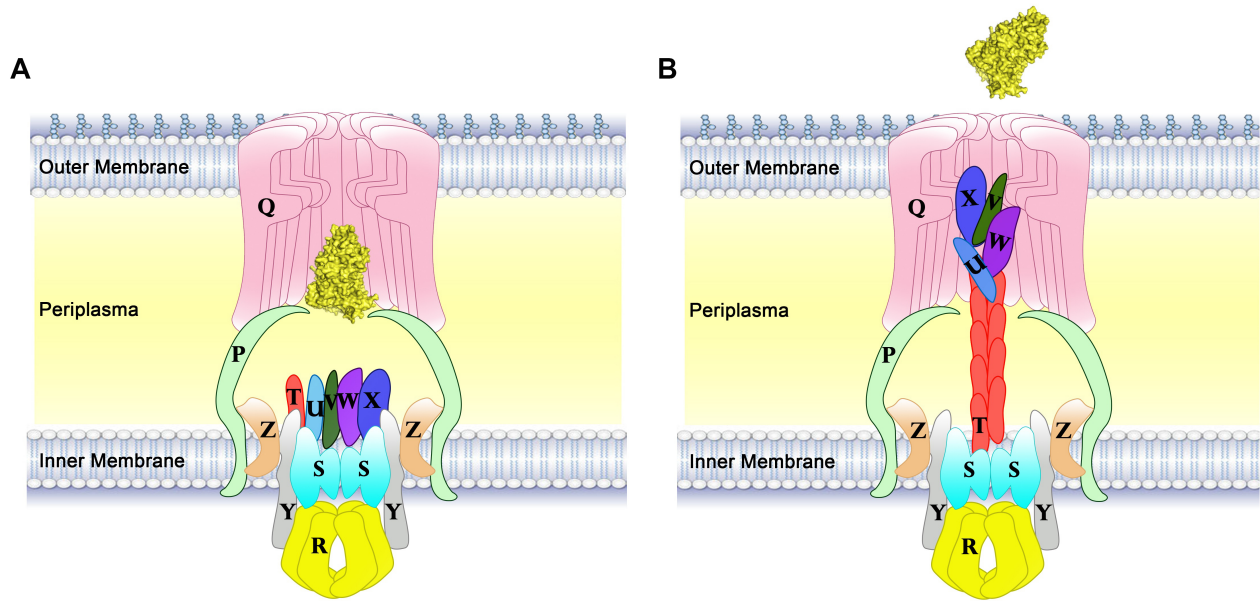

**S1 Figure Schematic models of the Type II secretion system.** (A) The Type II secretion system consists of multiple protein components that form several subcomplexes. (B) The working model of the secretion of virulence factors in T2SS. The minor pseudopilins form a quaternary pseudopilus tip complex, and the major pseudopilin XcpT polymerizes into piston-like pseudopilus body to secrete substrate (yellow).
