# Supplementary material for: Structure-guided disruption of the pseudopilus tip complex inhibits the Type II secretion in Pseudomonas aeruginosa
Source: PubMed Central journal article supplement (PMC6211770; doi:10.1371/journal.ppat.1007343), 2018-10-22
Supplement: ppat.1007343.s008.pdf [file ppat.1007343.s008.pdf]

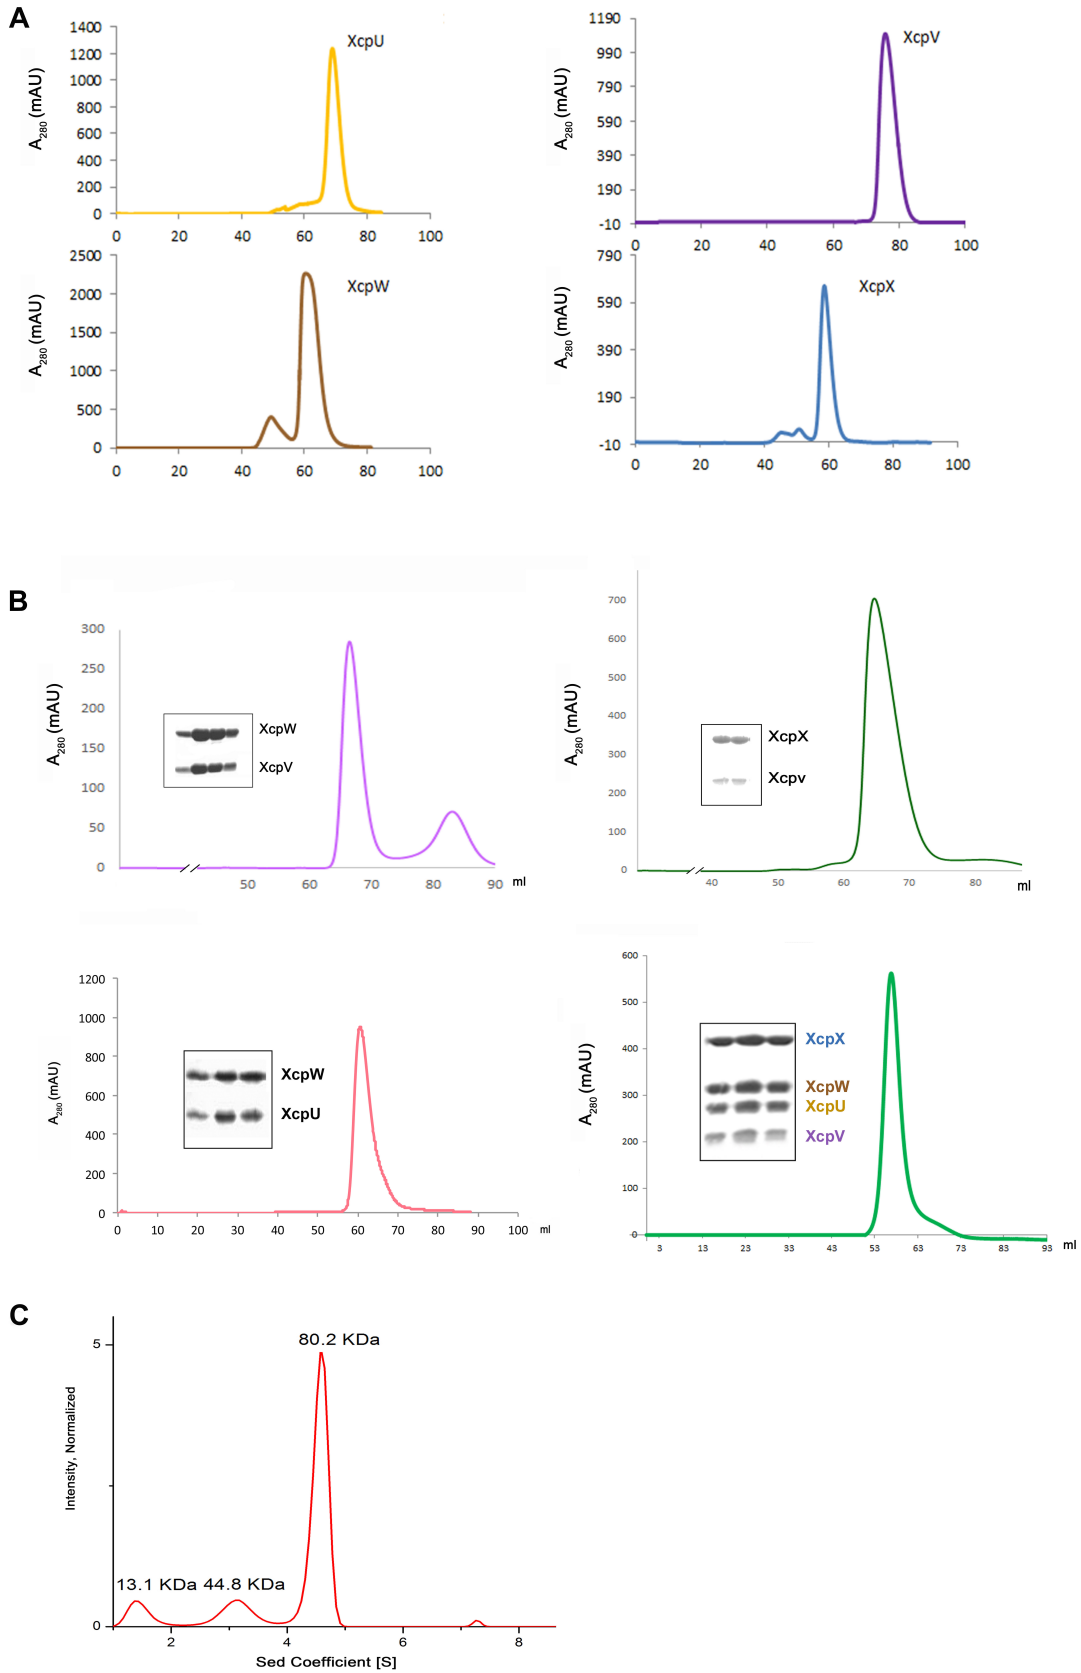

**S8 Figure Chromatographic profiles of individual minor pseudopilins and analytical ultracentrifugation (AUC) profile of the XcpUVWX quaternary complex.** (A) Each minor pseudopilin was individually expressed and purified using Ni<sup>2+</sup>-NTA resin followed by size exclusion chromatography using Superdex 75 column, after removal of the Trx tag. Each pseudopilin produces a single peak corresponding to monomer of the expected molecular weight. (B) Formation of different minor pseudopilin complexes was observed in size exclusion chromatography, and confirmed by SDS-PAGE. (C) The major AUC peak corresponds to the quaternary complex of ~80 kDa, confirming the formation of the XcpUVWX complex.
