# Supplementary material for: Structure-guided disruption of the pseudopilus tip complex inhibits the Type II secretion in Pseudomonas aeruginosa
Source: PubMed Central journal article supplement (PMC6211770; doi:10.1371/journal.ppat.1007343), 2018-10-22
Supplement: ppat.1007343.s009.pdf [file ppat.1007343.s009.pdf]

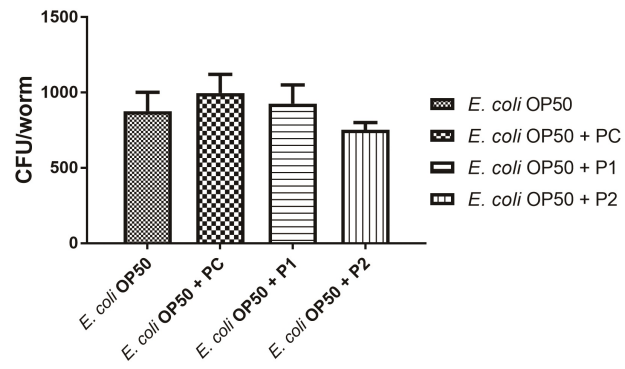

**S9 Figure. Structure-based peptides that inhibit the T2SS of *P. aeruginosa* do not affect *E. coli* colonization in *C. elegans*.**
