# Supplementary material for: Structure-guided disruption of the pseudopilus tip complex inhibits the Type II secretion in Pseudomonas aeruginosa
Source: PubMed Central journal article supplement (PMC6211770; doi:10.1371/journal.ppat.1007343), 2018-10-22
Supplement: ppat.1007343.s010.pdf [file ppat.1007343.s010.pdf]

**S1 Table. SAXS data collection and processing statistics**

|                                    | XcpUVWX         |
|------------------------------------|-----------------|
| $q$ -range ( $\text{\AA}^{-1}$ )   | 0.0107 – 0.2767 |
| Guinier $R_g$ ( $\text{\AA}$ )     | 30.02           |
| $\rho(r)$ $R_g$ ( $\text{\AA}$ )   | 30.02           |
| $I(0)$                             | 0.023           |
| $D_{\max}$ ( $\text{\AA}$ )        | 96.34           |
| Porod Volume ( $\text{\AA}^3$ )    | 126,000         |
| Estimated Molecular Weight (kDa)   | 83.1            |
| Theoretical Molecular Weight (kDa) | 80.3            |
