# Supplementary material for: Structure-guided disruption of the pseudopilus tip complex inhibits the Type II secretion in Pseudomonas aeruginosa
Source: PubMed Central journal article supplement (PMC6211770; doi:10.1371/journal.ppat.1007343), 2018-10-22
Supplement: ppat.1007343.s011.pdf [file ppat.1007343.s011.pdf]

**S2 Table. Transposon Mutant Strains used in the Experiments**

| <b>Strain Name</b> | <b>Location</b> | <b>PA ORF</b> | <b>Gene Abbrev.</b> | <b>Position in ORF</b> | <b>Forward Primer Sequence</b> | <b>Reverse Primer Sequence</b> |
|--------------------|-----------------|---------------|---------------------|------------------------|--------------------------------|--------------------------------|
| PW6203             | lacZwp09q1D01   | PA3097        | <i>xcpX</i>         | 738(1002)              | AGAACAGGCAACTGCCCTC            | CGTTTCAACCTCAACGGACT           |
| PW6204             | lacZwp09q3E07   | PA3097        | <i>xcpX</i>         | 271(1002)              | ACGGCATAACTGACGTTTCC           | CTCGACAAGGAGCACAAGT            |
| PW6206             | phoAwp07q2A07   | PA3098        | <i>xcpW</i>         | 26(714)                | CTCCAGGGTCATCTCCACC            | CGAATTGCAACTGGAACAGA           |
| PW6205             | lacZwp02q1G09   | PA3098        | <i>xcpW</i>         | 18(714)                | CTCCAGGGTCATCTCCACC            | CGAATTGCAACTGGAACAGA           |
| PW6208             | phoAwp06q2H02   | PA3099        | <i>xcpV</i>         | 240(390)               | GTCCAGAACCAGCCAGTAGC           | GCGAGAAGGAGCAGAAGAAA           |
| PW6207             | lacZwp05q3G01   | PA3099        | <i>xcpV</i>         | 74(390)                | TCCAGAACCAGCCAGTAGC            | GCGAGAAGGAGCAGAAGAAA           |
| PW6210             | phoAbp03q1B01   | PA3100        | <i>xcpU</i>         | 434(519)               | CTGTCTGAACATGCGGTAGGT          | ATCGAGCTGATGGTGGTGAT           |
| PW6209             | lacZbp01q3E10   | PA3100        | <i>xcpU</i>         | 26(519)                | CCAGTTGCAATTCGTTGAGA           | GCTGGACAACCTCGCCTATC           |
